# Supplementary material for: Beta-Blocker-Related Atrioventricular Conduction Disorders—A Single Tertiary Referral Center Experience
Source: MDPI journal article supplement (doi:10.3390/medicina58020320), 2022-02-20
Supplement: s1 [file s1]

**Table S1.** Laboratory tests.

| Test             | BB+<br>(n=253)       | BB-<br>(n=343)     | Total<br>(n=596)   | P value | Normal range and unit of<br>measure |
|------------------|----------------------|--------------------|--------------------|---------|-------------------------------------|
| Na               | 137.6 ± 4.8          | 140 ± 3.4          | 138.4 ± 4.1        | <0.001  | 135 – 148 mmol/L                    |
| K                | 4.6 ± 0.94           | 4.4 ± 0.59         | 4.5 ± 0.76         | 0.01    | 3.5 – 5.1 mmol/L                    |
| Ca               | 1.2 ± 0.09           | 1.2 ± 0.08         | 1.2 ± 0.08         | 0.06    | 1.16 – 1.35 mmol/L                  |
| Serum creatinine | 1.3 ± 0.68           | 1.2 ± 0.76         | 1.2 ± 0.73         | 0.06    | 0.5 – 0.9 mg/dl                     |
| Urea             | 63.8 ± 36            | 56.2 ± 31.2        | 59.4 ± 33.5        | 0.01    | 10 -50 mg/dl                        |
| eGFR             | 55.5 ± 21.2          | 62.9 ± 20.2        | 59.7 ± 21          | <0.001  | >90 ml/min/1.73 m²                  |
| Uric acid        | 6.9 ± 1.7            | 6.5 ± 1.7          | 6.7 ± 1.7          | 0.01    | 2.4-5.7 mg/dl                       |
| Glucose          | 129.1 ± 63.5         | 117.4 ± 36.2       | 122.3 ± 50         | 0.01    | 75 – 115 mg/dl                      |
| AST              | 44.7 ± 60.2          | 44.6 ± 91.2        | 44.7 ± 79.5        | 0.98    | 0 – 31 U/L                          |
| ALT              | 38.5 ± 42            | 43.1 ± 87.4        | 41.1 ± 71.7        | 0.43    | 0 – 31 U/L                          |
| GGT              | 64.3 ± 79.8          | 52.9 ± 60.6        | 57.7 ± 69.5        | 0.05    | 7 – 32 U/L                          |
| Cholesterol      | 182.7 ± 46.7         | 181.1 ± 46.1       | 181.8 ± 46.3       | 0.68    | 0-200 mg/dl                         |
| LDL-cholesterol  | 113.8 ± 37.8         | 110.6 ± 37.7       | 112 ± 37.8         | 0.31    | 0-160 mg/dl                         |
| HDL-cholesterol  | 46.5 ± 15            | 47.8 ± 13.6        | 47.2 ± 14.2        | 0.27    | 42-98 mg/dl                         |
| Triglyceride     | 118.6 ± 67           | 120.7 ± 81.9       | 119.8 ± 76         | 0.74    | 35-150 mg/dl                        |
| INR              | 1.5 ± 1.1            | 1.2 ± 0.79         | 1.4 ± 0.96         | <0.001  | 0.76 – 1.24                         |
| CRP              | 23.2 ± 40.9          | 15.7 ± 27.5        | 18.98 ± 33.9       | 0.02    | 0-5 mg/l                            |
| WBC              | 9250.5 ± 4929.5      | 8515.2 ± 2982.9    | 8827.4 ± 3941.9    | 0.03    | 4000 – 10500/mm³                    |
| RBC              | 4.4 ± 0.62           | 4.5 ± 0.6          | 4.5 ± 0.60         | 0.32    | 4.2 – 5.4 mil/mm³                   |
| Hb               | 13.2 ± 1.7           | 13.4 ± 1.7         | 13.3 ± 1.7         | 0.09    | 12.5 – 16 g/dl                      |
| PCV              | 39.7 ± 5             | 40.6 ± 5.1         | 40.2 ± 5.1         | 0.02    | 37 – 47%                            |
| MCV              | 89.6 ± 5.6           | 90 ± 5.7           | 89.3 ± 5.7         | 0.33    | 78 – 100 fl                         |
| MCH              | 29.6 ± 2.4           | 29.7 ± 2.1         | 29.6 ± 2.2         | 0.45    | 32 – 36 g/dl                        |
| MCHC             | 32.8 ± 1             | 32.9 ± 1.1         | 32.9 ± 1.1         | 0.83    | 27-31 pg                            |
| Platelets        | 214919.4 ± 75624.608 | 220017.2 ± 74853.1 | 217853.2 ± 75160.5 | 0.41    | 150000-450000/mm³                   |

Na: sodium; K: potassium; Ca: calcium; AST: aspartate aminotransferase; ALT: alanine aminotransferase; GGT: gamma glutamyl transferase; LDL: low-density lipoprotein; HDL: high-density lipoprotein; INR: International Normalized Ratio; CRP: C-reactive protein; MCV: mean corpuscular volume; MCH: mean corpuscular hemoglobin; MCHC: mean corpuscular hemoglobin concentration.

**Table S2.** Candidate variables and univariable regression results.

| Parameter                        | Univariate regression |            |          | Multivariate regression |           |          |
|----------------------------------|-----------------------|------------|----------|-------------------------|-----------|----------|
|                                  | OR                    | 95% CI     | p value  | OR                      | 95%CI     | p value  |
| <b>Bradyarrhythmia type</b>      |                       |            |          |                         |           |          |
| Third degree AV block baseline   | Baseline              | Baseline   | Baseline | Baseline                | Baseline  | Baseline |
| Type 2 Second degree AV block    | 0.49                  | 0.29-0.84  | 0.01     | 0.84                    | 0.46-1.5  | 0.560    |
| Slow atrial fibrillation         | 1.63                  | 1.06-2.49  | 0.02     | 4.18                    | 2.4-7.3   | <0.001   |
| Sick sinus syndrome              | 1.07                  | 0.66-1.73  | 0.8      | 2.8                     | 1.5-5.1   | 0.001    |
| Sinus bradycardia + sinus pauses | 8.91                  | 2.56-31.02 | 0.001    | 32.9                    | 8.4-128.8 | <0.001   |
| <b>Bundle branch block</b>       |                       |            |          |                         |           |          |
| None                             | Baseline              | Baseline   | Baseline |                         |           |          |
| RBBB                             | 1.29                  | 0.82-2.0   | 0.25     |                         |           |          |
| LBBB                             | 1.85                  | 0.99-3.4   | 0.05     |                         |           |          |
